# Supplementary material for: In situ surface modification engineering for synthesizing nano-absorbers with self-forming heterointerfaces and prominent electromagnetic wave absorption
Source: Royal Society of Chemistry journal article supplement (doi:10.1039/d4tc05139d), 2025-01-01
Supplement: d4tc05139d1.pdf [file d4tc05139d1.pdf]

## Supplementary Information

### **Nano-absorbers via in-situ surface modification engineering with self-forming heterointerfaces and prominent electromagnetic wave absorption**

Rongsheng Bai<sup>1, 2, #</sup>, Yue-e Zhang<sup>2, 3, #</sup>, Ziqing Yin<sup>1</sup>, Lei Chang<sup>1</sup>, Hongjie Xu<sup>1, \*</sup>, Zhiyong Xue<sup>1, \*</sup>, Haibo Ke<sup>2, \*</sup>, Weihua Wang<sup>1, 2, 3, 4</sup>

<sup>1</sup> School of Energy Power and Mechanical Engineering, North China Electric Power University, Beijing 102206, China

<sup>2</sup> Songshan Lake Materials Laboratory, Dongguan 523808, China

<sup>3</sup> College of Physics, Liaoning University, Shenyang 110036, China

<sup>4</sup> Institute of Physics, Chinese Academy of Sciences, Beijing 100190, China

# These authors contributed equally to this work.

\*Corresponding authors: [xuhongjie@ncepu.edu.cn](mailto:xuhongjie@ncepu.edu.cn); [xuezy@ncepu.edu.cn](mailto:xuezy@ncepu.edu.cn);  
[kehaibo@sslslab.org.cn](mailto:kehaibo@sslslab.org.cn)

**Fig. S1** SAED result of (a) S1, (b) S2, (c) S3, and (d) S4.

**Fig. S2** The statistical particle size of S1-S4.

**Fig. S3** The EDS mapping results of SEM for S2.

**Fig. S4** XPS results of S1-S4.

**Fig. S5** TEM result of S2 after exposure in air for six months.

**Fig. S6** (a) The  $M_s$  and  $H_c$  of S1-S4; (b)  $M-T$  curves of S1-S4.

**Fig. S7** (a-d) RL- $f$  curves under different thicknesses of NA1-NA4. The EAB of (e) NA1 and (f) NA2 at different thicknesses.

**Table S1** The  $M_s$  in this work and other works reported currently.

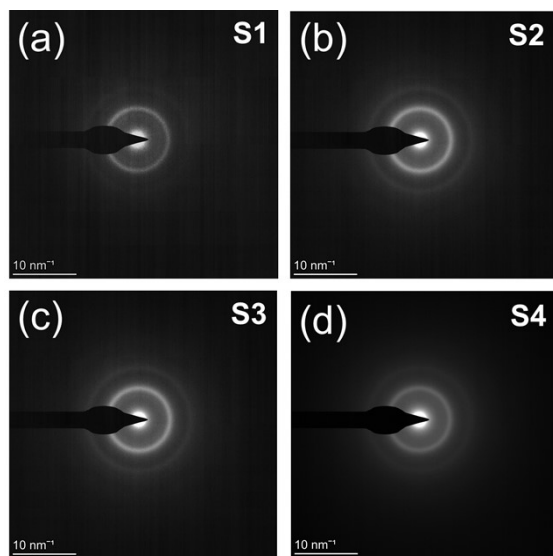

**Fig. S1**

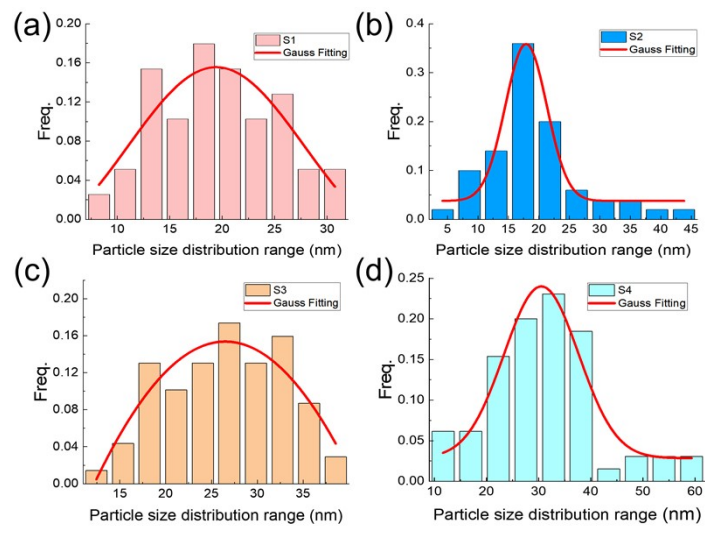

**Fig. S2**

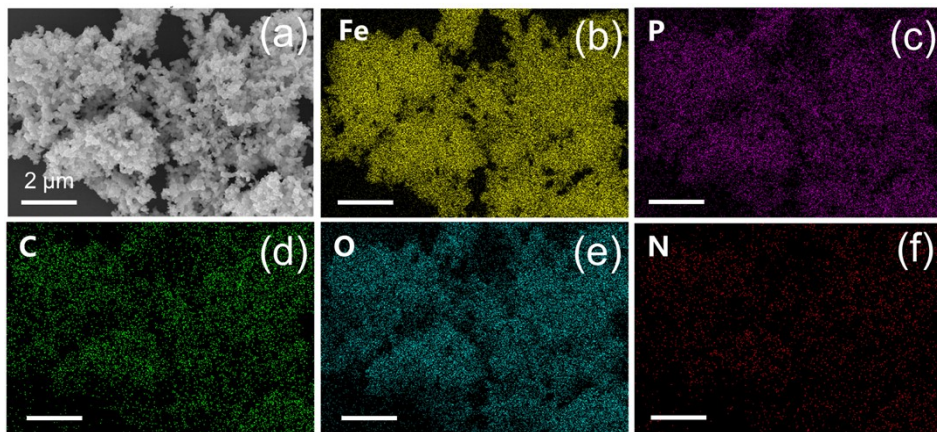

**Fig. S3**

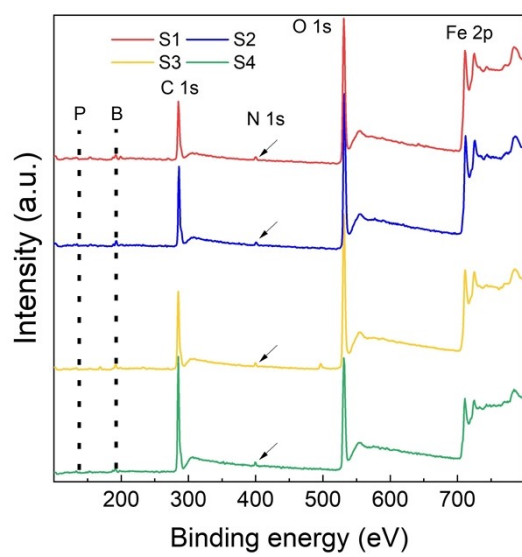

**Fig. S4**

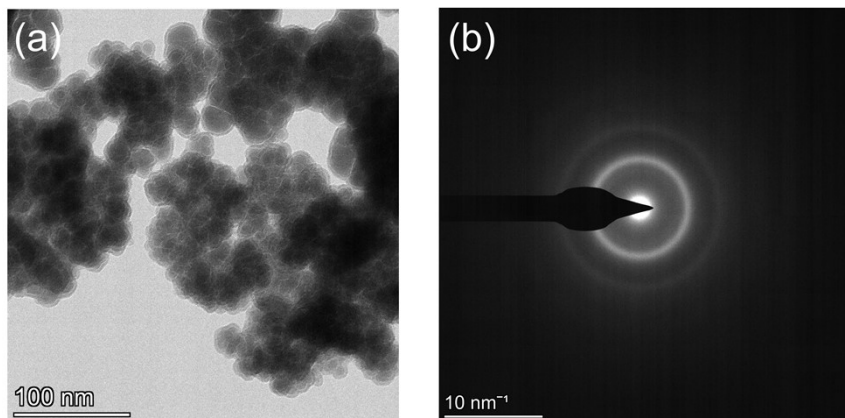

**Fig. S5**

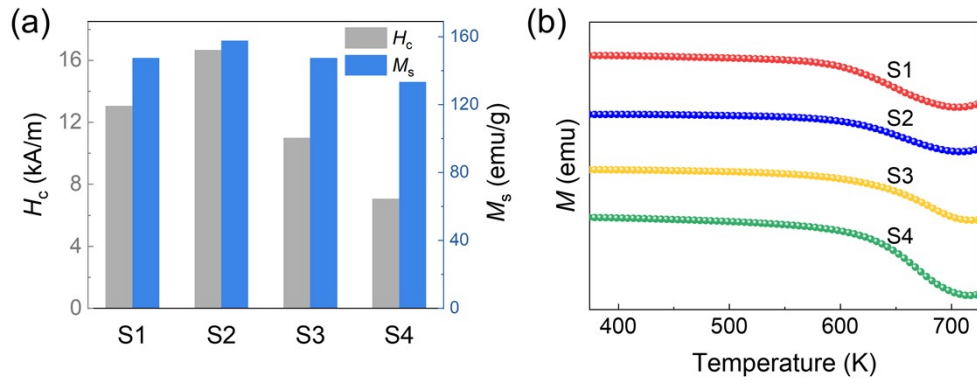

**Fig. S6**



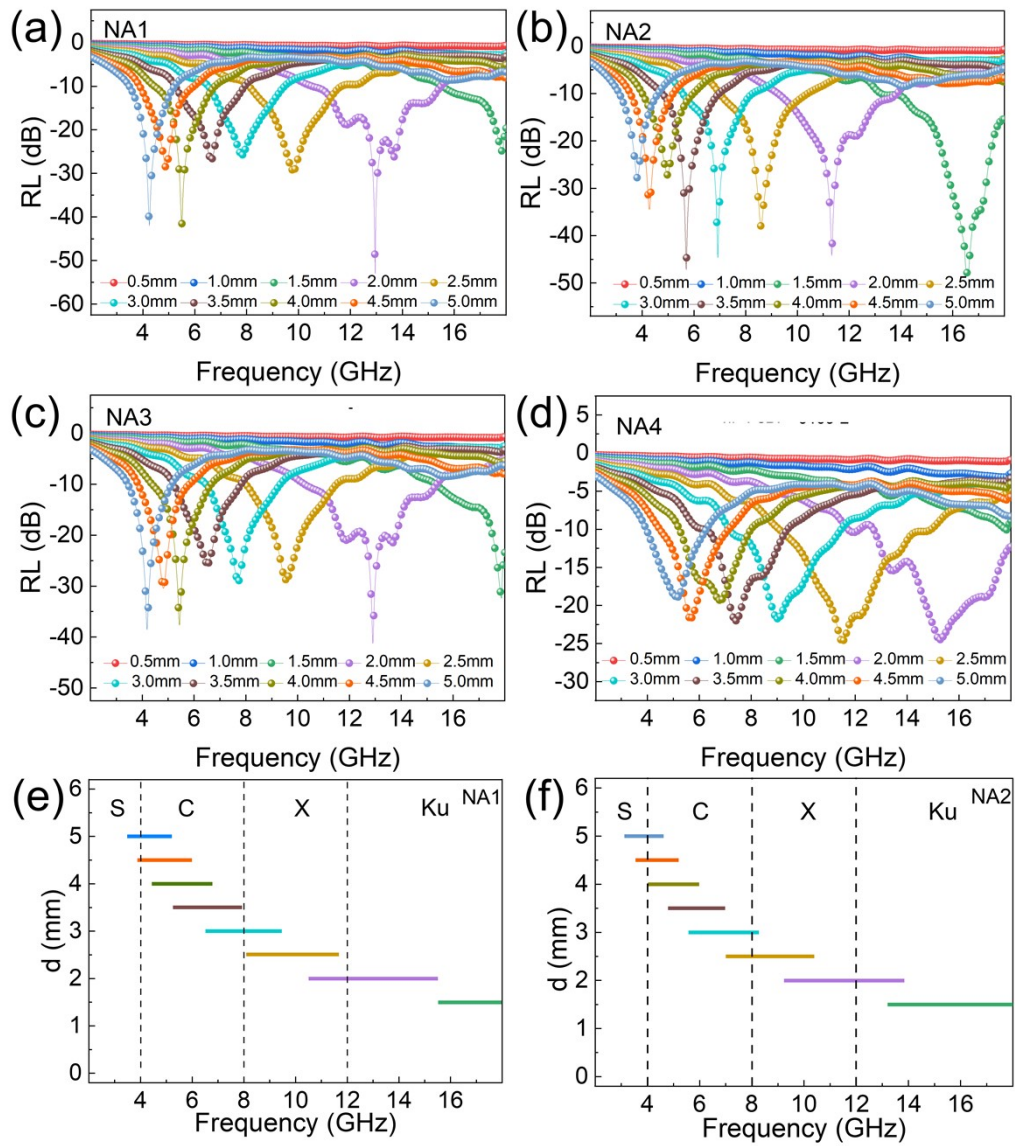

**Fig. S7**

**Table S1**

| <b>Nano-composites</b>                              | <b><math>M_s</math> (emu/g)</b> | <b>Refs.</b> |
|-----------------------------------------------------|---------------------------------|--------------|
| Fe <sub>2</sub> (MoO <sub>4</sub> ) <sub>3</sub> @C | 15.42                           | [5]          |
| CoFe <sub>2</sub> O <sub>4</sub> /RGO@PVP           | 54.2                            | [10]         |
| FeNi/SWCNT                                          | 79.3                            | [27]         |
| Graphene@Fe <sub>3</sub> O <sub>4</sub> /SiBCN      | 20                              | [28]         |
| Fe-P-2C                                             | 24.3                            | [53]         |
| S2                                                  | 157                             | This work    |
